# Supplementary material for: Zinc sensing by metal-responsive transcription factor 1 (MTF1) controls metallothionein and ZnT1 expression to buffer the sensitivity of the transcriptome response to zinc
Source: Royal Society of Chemistry journal article supplement (doi:10.1039/c5mt00305a), 2016-01-01
Supplement: c5mt00305a2.xlsx [file c5mt00305a2.xlsx]

## Sheet: Sheet1
	Genes responding to zinc only in cells transfected with control siRNA			Genes responding to zinc only in cells transfected with MTF1 siRNA			Genes responding to zinc in cells transfected with control siRNA AND in cells tranfected with MTF1 siRNA
	Gene symbol	Fold change		Gene symbol	Fold change		Gene symbol	Fold change with control siRNA	Fold change with MTF1 siRNA	Fold change ratio MTF1 control versus knockdown
	TTR	-2.262		FGG	-2.407		PHGR1	-2.611	-2.171	1.20267
	CALML4	-2.205		AFP	-2.274		CXCL12	-2.558	-2.102	1.21694
	NDUFB11	-1.95		TFF3	-2.193		GSTA1	-2.384	-2.175	1.09609
	LOC653156	-1.896		TAF15	-2.144		CPS1	-2.358	-2.985	0.78995
	ATP5G2	-1.885		FGB	-2.141		IFI6	-2.271	-1.767	1.28523
	PHPT1	-1.844		EPHX2	-2.126		RHBDL3	-2.111	-2.175	0.970575
	LAMTOR2	-1.829		TM7SF2	-2.114		LOC647169	-2.016	-2.119	0.951392
	TRAPPC6A	-1.829		PRR15L	-2.105		ABCA1	-2.009	-2.683	0.748789
	TRAPPC5	-1.729		MTTP	-2.046		HIST1H2BD	-2.003	-1.626	1.23186
	C10orf32	-1.71		SLC39A10	-2.007		GSTA2	-1.954	-2.007	0.973592
	C1orf53	-1.71		NYNRIN	-2.003		HMGCS2	-1.953	-2.795	0.698748
	COX16	-1.687		NFE2L3	-2		D2HGDH	-1.947	-2.152	0.90474
	ASTN2	-1.663		GLUD1	-1.995		GABRP	-1.858	-2.011	0.923918
	IFITM2	-1.663		TF	-1.994		ATP7B	-1.855	-2.25	0.824444
	TNNC1	-1.657		CHST13	-1.973		APOB	-1.829	-2.522	0.725218
	C1orf86	-1.645		GPR83	-1.945		REEP6	-1.796	-2.175	0.825747
	CGB1	-1.642		RBP2	-1.941		SLC22A11	-1.76	-1.832	0.960699
	CUTA	-1.63		SERPINA1	-1.923		ODZ4	-1.756	-1.748	1.00458
	CYBA	-1.63		ALDH1A1	-1.914		METTL7B	-1.747	-2.084	0.838292
	NHP2	-1.625		SLC39A8	-1.911		ST6GAL1	-1.74	-2.072	0.839768
	TRAPPC2L	-1.615		SCGN	-1.904		GSTM1	-1.717	-1.736	0.989055
	LSM7	-1.595		AGT	-1.892		SULT2A1	-1.713	-2.056	0.833171
	LOC728650	-1.575		MTUS2	-1.821		HSD17B2	-1.68	-1.793	0.936977
	C17orf49	-1.568		ALB	-1.789		IGFBP3	-1.665	-2.043	0.814978
	DGAT1	-1.563		CLRN3	-1.783		ATP6V1B1	-1.65	-2.068	0.797872
	TMEM8B	-1.561		PTK7	-1.777		GBA3	-1.636	-2.052	0.797271
	CRABP2	-1.553		CCKBR	-1.766		AHSG	-1.621	-1.977	0.819929
	C20orf3	-1.547		ANXA9	-1.755		FOLR1	-1.616	-1.685	0.95905
	XAGE2/XAGE2B	-1.53		PCCA	-1.75		ACOX2	-1.611	-1.784	0.903027
	LOC100131205	-1.524		GLB1	-1.743		SGPP2	-1.606	-1.794	0.895206
	tcag7.23	-1.521		MCCC1	-1.73		MPP1	-1.605	-2.063	0.777993
	MRPS24	-1.511		TBCE	-1.725		RXRA	-1.605	-1.618	0.991965
	HMMR	1.527		PHYH	-1.712		SLC16A10	-1.597	-1.782	0.896184
	CCNE2	1.532		GALC	-1.707		AADAC	-1.584	-1.573	1.00699
	ALKBH3	1.533		MYO7A	-1.7		ASGR1	-1.582	-1.661	0.952438
	CNBP	1.537		KCNG1	-1.698		UBE2L6	-1.574	-1.592	0.988693
	FTHL12	1.539		CSF3R	-1.697		SERPINF2	-1.562	-1.692	0.923168
	ARL5B	1.542		VAV3	-1.691		GALNT11	-1.554	-1.946	0.798561
	TXNRD1	1.575		DFNA5	-1.687		UPK1A	-1.55	-1.908	0.812369
	CDK1	1.597		STEAP3	-1.686		SLC7A2	-1.54	-1.697	0.907484
	SPAG9	1.599		PRKCA	-1.684		MOCS1	-1.513	-1.739	0.87004
	TFRC	1.603		ADORA2B	-1.682		NCCRP1	-1.509	-1.645	0.917325
	P4HA2	1.608		DDC	-1.682		PTGR1	1.522	1.506	1.01062
	ZNF83	1.617		C11orf70	-1.673		EFNB2	1.546	1.677	0.921884
	ATL3	1.618		SULT1A3/SULT1A4	-1.673		VGF	1.577	1.638	0.962759
	SLC20A1	1.621		RNASE4	-1.668		CLTB	1.579	1.787	0.883604
	PRNP	1.653		CLDN3	-1.662		SOCS2	1.59	1.528	1.04058
	TRIB1	1.654		OAT	-1.654		CALD1	1.594	1.982	0.804238
				LYPD5	-1.651		CRISPLD2	1.621	2.132	0.760319
				KANK4	-1.648		IRS2	1.621	1.939	0.835998
				SPON1	-1.647		ULBP2	1.623	1.746	0.929553
				ECH1	-1.636		COL1A2	1.626	1.695	0.959292
				DYNC1I1	-1.63		RRAGD	1.627	1.752	0.928653
				SLC23A3	-1.616		ERP27	1.658	1.565	1.05942
				KRT80	-1.614		CCNYL1	1.662	1.526	1.08912
				PROM2	-1.611		UBC	1.666	1.899	0.877304
				CLDN15	-1.609		CRYAB	1.693	2.017	0.839365
				PRSS12	-1.601		COL5A1	1.719	2.069	0.830836
				ALDH3A2	-1.596		HSPH1	1.742	1.524	1.14304
				GNA12	-1.594		SRXN1	1.749	1.738	1.00633
				PCCB	-1.594		CYR61	1.755	1.857	0.945073
				ACSS1	-1.593		IER5	1.76	1.99	0.884422
				IDH1	-1.593		NPPB	1.76	2.904	0.606061
				MXD4	-1.587		AGPAT9	1.775	1.749	1.01487
				SIDT2	-1.585		RIOK3	1.777	1.817	0.977986
				C20orf54	-1.584		BHLHE40	1.778	1.965	0.904835
				GPAM	-1.578		KLF6	1.779	2.008	0.885956
				PEG10	-1.577		CDKN1A	1.781	2.311	0.770662
				MTSS1	-1.576		JUN	1.789	2.326	0.769132
				TSPYL3	-1.572		ZFP36	1.793	2.008	0.892928
				AMACR	-1.571		SYBU	1.799	1.683	1.06892
				SLCO2B1	-1.568		OSGIN1	1.803	2.001	0.901049
				BCAT2	-1.567		OLR1	1.808	1.808	1
				GUCY2C	-1.565		MAFF	1.838	1.689	1.08822
				A1CF	-1.564		RNU1-1	1.854	2.238	0.828418
				GNPAT	-1.561		KRT17	1.877	2.362	0.794666
				PAOX	-1.56		HBEGF	1.89	2.306	0.819601
				SLC39A5	-1.558		SAT1	1.895	2.079	0.911496
				ITGB5	-1.556		APOBEC3B	1.901	1.901	1
				NPEPL1	-1.553		AKR1C1/AKR1C2	1.956	1.789	1.09335
				FAM3B	-1.551		HMOX1	1.983	2.296	0.863676
				C3orf70	-1.55		ZNF77	2.025	1.831	1.10595
				NIPSNAP1	-1.548		ZFAND2A	2.029	2.501	0.811275
				SULT1A1	-1.547		IDS	2.042	2.127	0.960038
				OAF	-1.538		RN28S1	2.045	2.145	0.95338
				APOH	-1.537		EMP1	2.053	1.86	1.10376
				TMEM120A	-1.537		UCA1	2.063	2.647	0.779373
				ATP6V0A4	-1.535		NCRNA00152	2.069	3.129	0.661234
				SI	-1.533		DNAJB1	2.07	2.571	0.805134
				PCMTD2	-1.531		CEACAM1	2.074	2.205	0.94059
				DHRS11	-1.53		FSCN1	2.083	2.259	0.922089
				SOAT2	-1.528		RNU6-1	2.126	2.514	0.845664
				UROS	-1.523		ARHGDIB	2.194	2.473	0.887182
				TMEM86B	-1.522		RASD1	2.204	2.715	0.811786
				GAS6	-1.52		FHL2	2.224	2.21	1.00633
				FGA	-1.518		ZNF165	2.229	2.07	1.07681
				ALDH6A1	-1.515		SLCO2A1	2.243	2.293	0.978195
				TMEM45B	-1.514		RMRP	2.275	2.54	0.895669
				CBS	-1.513		SPP1	2.276	2.725	0.835229
				LAMA1	-1.51		FOSB	2.28	2.89	0.788927
				ALDH7A1	-1.509		BAG3	2.326	2.796	0.831903
				KAT2B	-1.507		PPP1R15A	2.326	2.953	0.787674
				TMOD1	-1.503		DUSP1	2.335	2.574	0.907148
				ASGR2	-1.502		EGR1	2.335	2.526	0.924386
				CCDC50	1.512		CTGF	2.414	2.306	1.04683
				TUBB2B	1.523		ATF3	2.483	3.147	0.789005
				MAP4K1	1.53		CSF1R	2.541	3.063	0.829579
				hCG27695	1.533		FLNC	2.567	3.402	0.754556
				FXYD5	1.535		ANXA1	2.816	3.127	0.900544
				EGLN1	1.538		CSRP1	2.874	2.625	1.09486
				RND3	1.539		TAGLN	2.917	3.442	0.847472
				TNFRSF11B	1.543		ACTA1	2.946	3.935	0.748666
				C12orf59	1.544		DDIT4	2.978	2.901	1.02654
				C12orf75	1.544		MAFB	3.307	3.666	0.902073
				SLC2A14	1.544		ADM	3.319	3.525	0.94156
				MSI2	1.546		FOS	3.473	3.984	0.871737
				IRF8	1.548		RPPH1	3.489	4.72	0.739195
				TOX2	1.552		GADD45B	3.62	4.339	0.834294
				FAM129A	1.553		UPP1	3.641	4.705	0.773858
				TICAM2	1.555		C20orf127	4.818	3.385	1.42334
				CCDC84	1.562		HSPA1A/HSPA1B	4.928	4.28	1.1514
				SERTAD1	1.563		SLC30A1	5.05	3.316	1.52292
				WNT3A	1.574		SERPINE2	5.217	4.884	1.06818
				ZYX	1.577		RN7SK	5.753	6.91	0.832562
				MRPL18	1.579		SNORD3C	7.14	8.359	0.854169
				KLF4	1.583		RN5S9	8.024	9.626	0.833576
				CSRNP1	1.592		SNORD3A	8.245	10.225	0.806357
				ANKRD37	1.597		HSPA6	9.345	13.024	0.717521
				C15orf48	1.598		SNORD3D	10.586	11.372	0.930883
				DNAJA4	1.6		MT1F	12.856	13.303	0.966399
				RALB	1.603		MT1B	13.647	2.677	5.09787
				KIF1A	1.609		MT1A	16.648	24.408	0.682071
				LAMB3	1.612		MT2A	18.716	25.249	0.741257
				RIMBP3	1.614		MT1M	20.825	5.82	3.57818
				FOSL1	1.619		MT1X	27.674	44.77	0.618137
				HLA-E	1.625		MT1E	28.09	27.53	1.02034
				MCM2	1.625		MT1H	28.203	15.887	1.77523
				CATSPER2	1.626		MT1G	28.557	23.62	1.20902
				C4BPB	1.63
				MBNL2	1.631
				TUFT1	1.632
				CD97	1.633
				KRT18	1.634
				GEM	1.642
				ITGA2	1.648
				SGK223	1.651
				NXF1	1.656
				TAP1	1.656
				GOSR2	1.669
				UAP1L1	1.671
				PTPLA	1.674
				C10orf54	1.676
				TGM2	1.683
				GULP1	1.689
				PEA15	1.689
				RRAS	1.69
				FHL3	1.693
				LYPD6B	1.695
				ACOT9	1.697
				DNAJC3	1.703
				SLC38A1	1.707
				RNY5	1.71
				PLAC8	1.715
				RAD9A	1.725
				PTS	1.729
				SNORD13	1.737
				DUSP5	1.738
				PTRF	1.745
				TRIB3	1.778
				GCLM	1.794
				STXBP6	1.797
				LBH	1.798
				RNU4-2	1.828
				GPRC5A	1.829
				TUBB2A	1.832
				SOX15	1.834
				IER3	1.878
				CLCF1	1.885
				SLC3A2	1.907
				RNU1-3	1.923
				RGS2	1.968
				HLA-G	1.986
				EPHA2	1.99
				ID1	1.991
				ANKRD1	1.995
				IL32	2.002
				PFKFB3	2.003
				RNU1-5	2.018
				CSRP2	2.037
				HSPA7	2.043
				TUBB3	2.083
				ACTA2	2.092
				DDIT3	2.225
				MYL7	2.265
				EMP3	2.297
				RNU6ATAC	2.353
				RNU6-15	2.418
				TNFRSF12A	2.537
				C13orf15	2.772
